# Supplementary material for: Islet cell dedifferentiation is a pathologic mechanism of long-standing progression of type 2 diabetes
Source: JCI journal article supplement (doi:10.1172/jci.insight.143791), 2021-01-10
Supplement: sd1 [file 1]

## **Islet cell dedifferentiation is a pathologic mechanism of longstanding progression of type 2 diabetes**

Kikuko Amo-Shiinoki, Katsuya Tanabe, Yoshinobu Hoshii, Hiroto Matsui, Risa Harano, Tatsuya Fukuda, Takato Takeuchi, Ryotaro Bouchi, Tokiyo Takagi, Masayuki Hatanaka, Komei Takeda, Shigeru Okuya, Wataru Nishimura, Atsushi Kudo, Shinji Tanaka, Minoru Tanabe, Takumi Akashi, Tetsuya Yamada, Yoshihiro Ogawa, Eiji Ikeda, Hiroaki Nagano and Yukio Tanizawa

### **Supplemental Information**

#### **Contents:**

**Supplemental Figure 1;** Morphometric analysis of islets in pancreatic tissue sections from non-diabetic subjects and diabetic subjects

**Supplemental Figure 2;** The percentages of dedifferentiated cells in distinct pancreatic portions and analysis of two transcription factors, MAFA and NKX6.1

**Supplemental Figure 3;** Fluorescent image of islets stained separately for ChgA, insulin and pancreatic hormones and correlations between dedifferentiation score and BMI for each group

**Supplemental Figure 4;** Alterations in  $\alpha$ -cells with disease progression

**Supplemental Table 1;** Clinical characteristics of individual study subjects

**Supplemental Table 2;** Single regression analyses of dedifferentiation score with C-peptide index and diabetes duration in each group

**Supplemental Table 3;** The features of the subjects analyzed in Figure 4 and the classification into 3 comparison sets

**Supplemental Table 4;** Antibodies used for immunohistochemistry

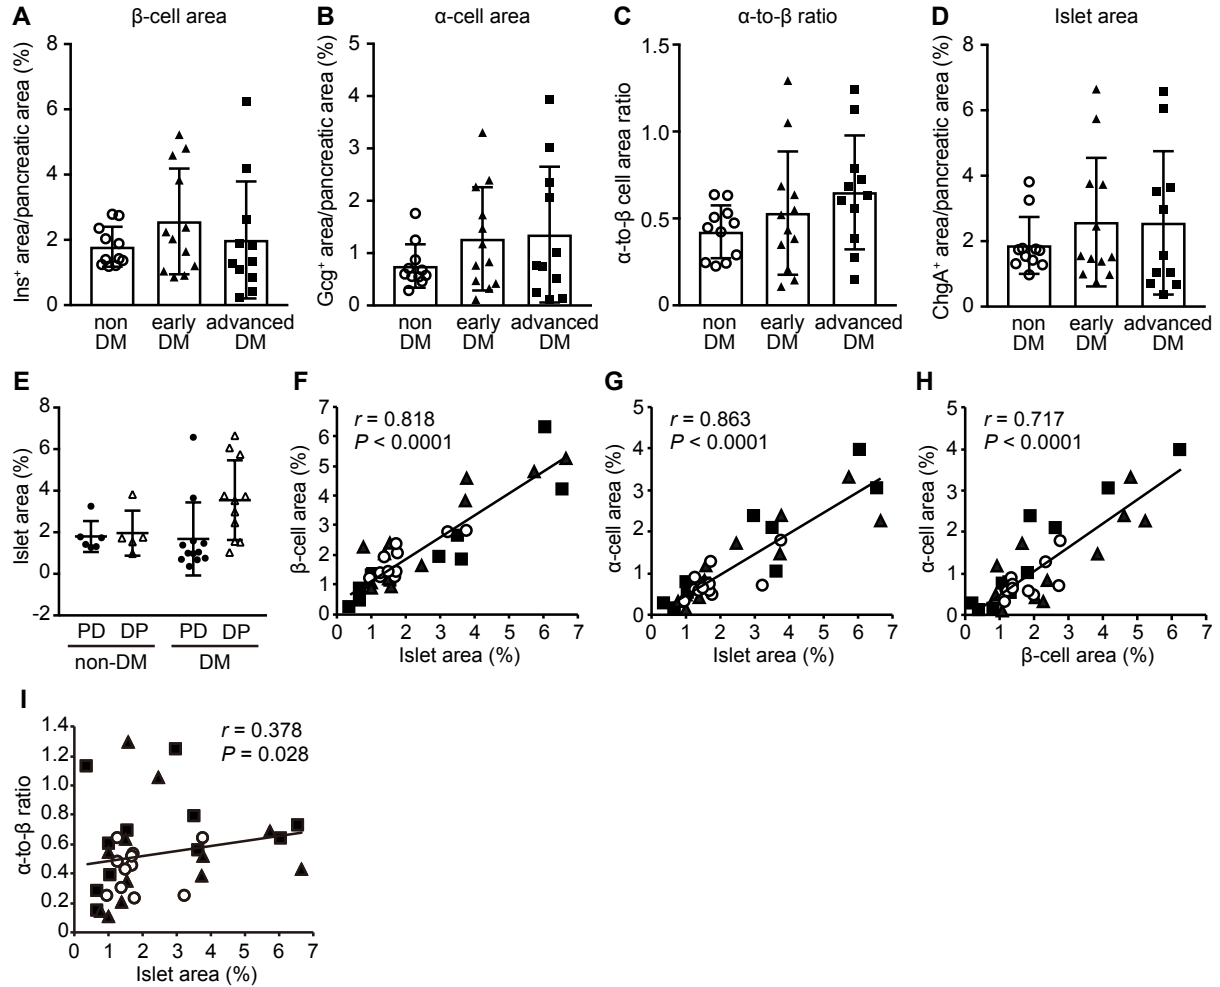

### Supplemental Figure 1. Morphometric analysis of islets in pancreatic tissue sections from non-diabetic subjects and diabetic subjects

Comparisons of (A)  $\beta$ -cell area, (B)  $\alpha$ -cell area, (C) ratio of  $\alpha$ -cell area to  $\beta$ -cell area and (D) islet area, calculated as  $\text{ChgA}$ -immunoreactive area relative to total pancreatic section area. Data are means  $\pm$  SD.  $n=11$  for non-DM,  $n=12$  for early-DM,  $n=11$  for advanced-DM. We performed single regression analysis for comparisons between morphometric parameters (Spearman's  $r$ ). (E) Comparison of islet area between distinct portions of the pancreas in each group. PD, pancreatoduodenectomy denoted by closed circles. DP, distal pancreatectomy denoted by open triangles. (F) Correlation between  $\beta$ -cell area and islet area. (G) Correlation between  $\alpha$ -cell area and islet area. (H) Correlation between  $\alpha$ -cell area and  $\beta$ -cell area. (I) Correlation between  $\alpha$ -to- $\beta$  cell area ratio and islet area. Open circles, non-DM control subjects. Closed triangles, early-DM subjects. Closed squares, advanced-DM subjects.

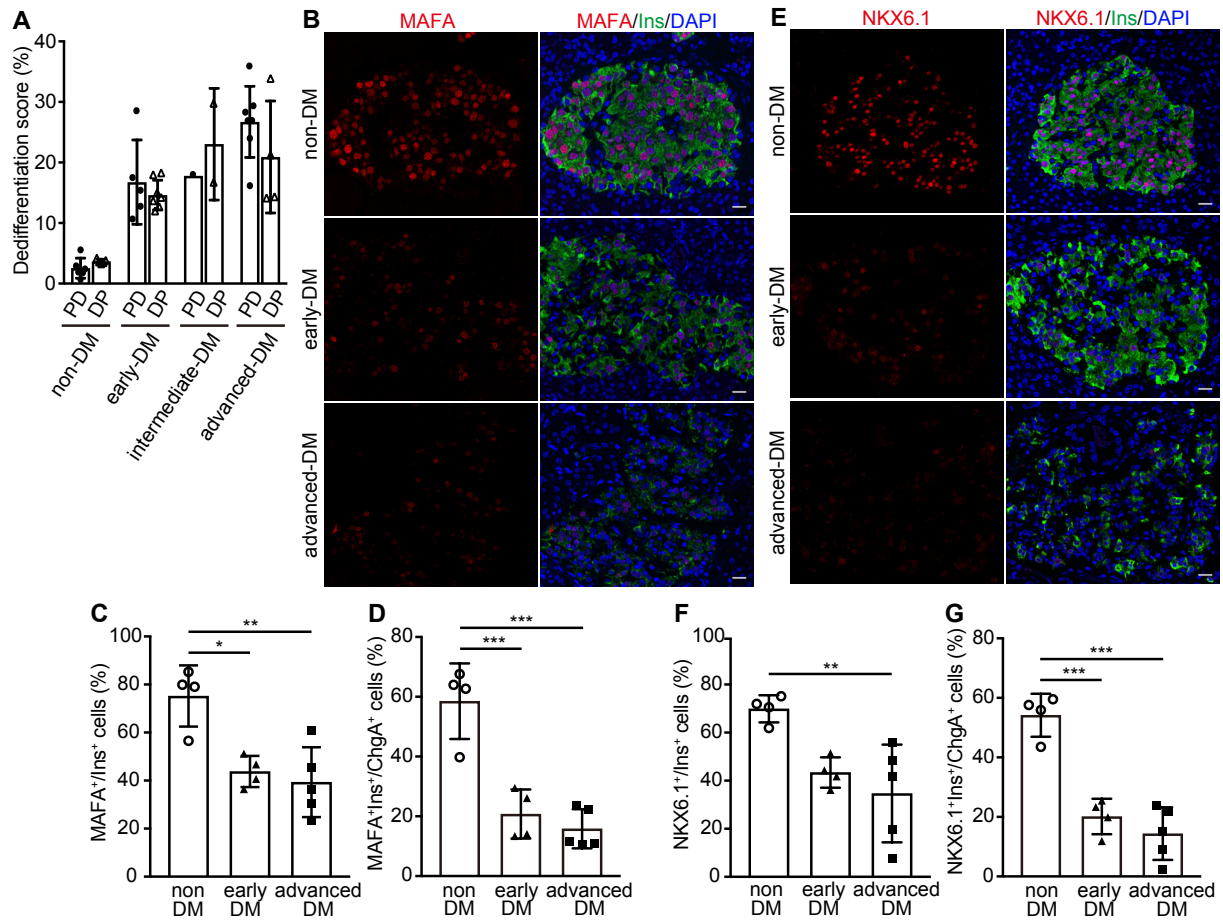

**Supplemental Figure 2. The percentages of dedifferentiated cells in distinct pancreatic portions and analysis of two transcription factors, MAFA and NKX6.1**

(A) Dedifferentiation scores in distinct portions of the pancreas in each group. PD, denoted by closed circles. DP, denoted by open triangles. (B) Immunofluorescence of pancreatic islets with MAFA (red), Insulin (green) and DAPI (blue). Scale bars, 20  $\mu$ m. Quantitative analysis of MAFA and insulin double-positive cells normalized by (C) number of insulin-positive cells and (D) number of ChgA-positive cells in the pancreatic sections from subjects in each group. (E) Immunofluorescence with NKX6.1 (red), Insulin (green) and DAPI (blue). Scale bars, 20  $\mu$ m. Quantitative analysis of NKX6.1 and insulin double-positive cells for (F) insulin-positive cells and (G) ChgA-positive cells in the pancreatic sections from subjects in each group. Data are means  $\pm$  SD (n=4 for non-DM and early-DM, respectively. n=5 for advanced-DM). \*,  $P<0.05$ ; \*\*,  $P<0.01$ ; \*\*\*,  $P<0.001$  by one-way ANOVA followed by Bonferroni's post hoc test.

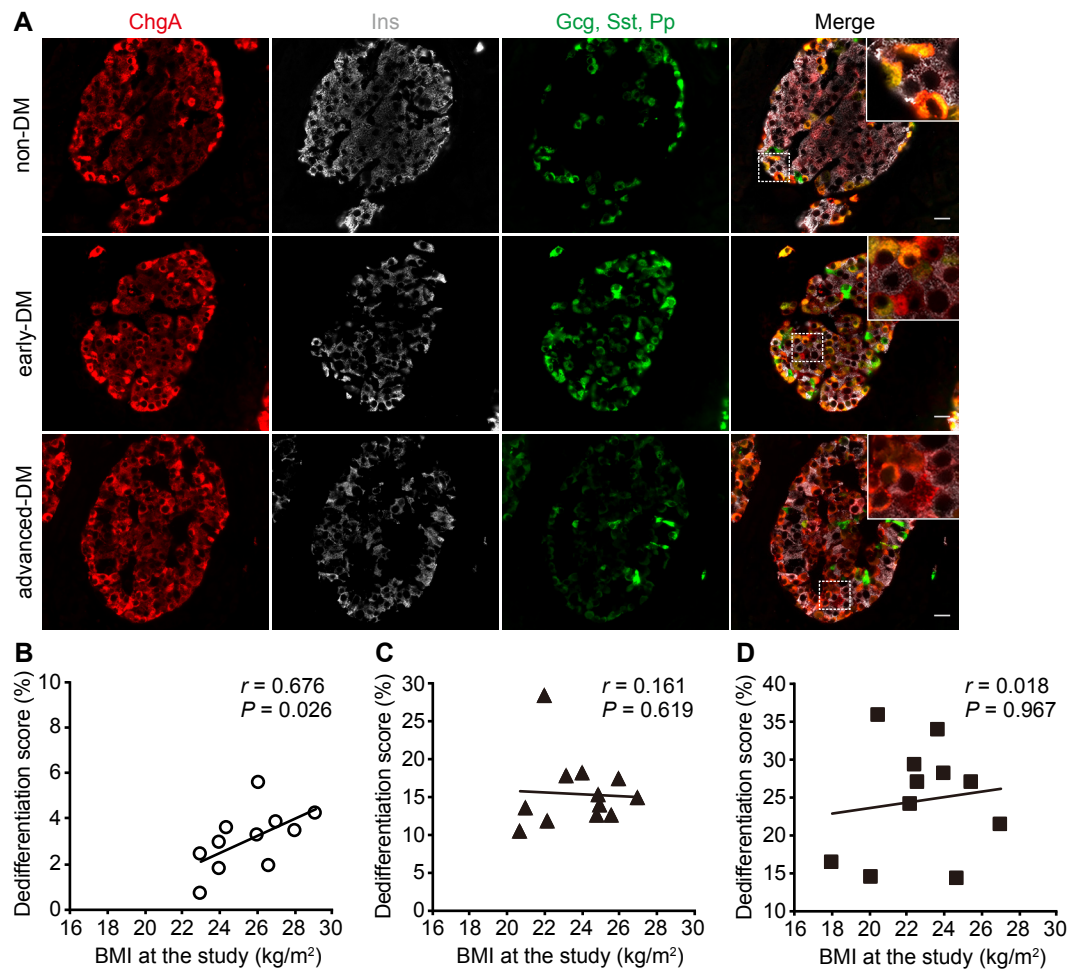

**Supplemental Figure 3. Fluorescent image of islets separately stained for insulin and other pancreatic hormones separately in endocrine cells and correlations of dedifferentiation score with BMI for each group**

(A) Representative images of pancreatic islets immunostained with ChgA (red), insulin (Ins, gray) and hormone cocktail (glucagon, somatostatin, pancreatic polypeptide) (green). Insets demonstrate representative cells. Scale bar, 20  $\mu$ m. The immunohistochemical analysis was performed in 3 subjects of each group. Single regression analysis (Spearman's  $r$ ) for correlation between BMI prior to pancreatectomy and dedifferentiation scores. The analysis was performed for each group, (B) non-DM (n=11), (C) early-DM (n=12) and (D) advanced-DM (n=11).

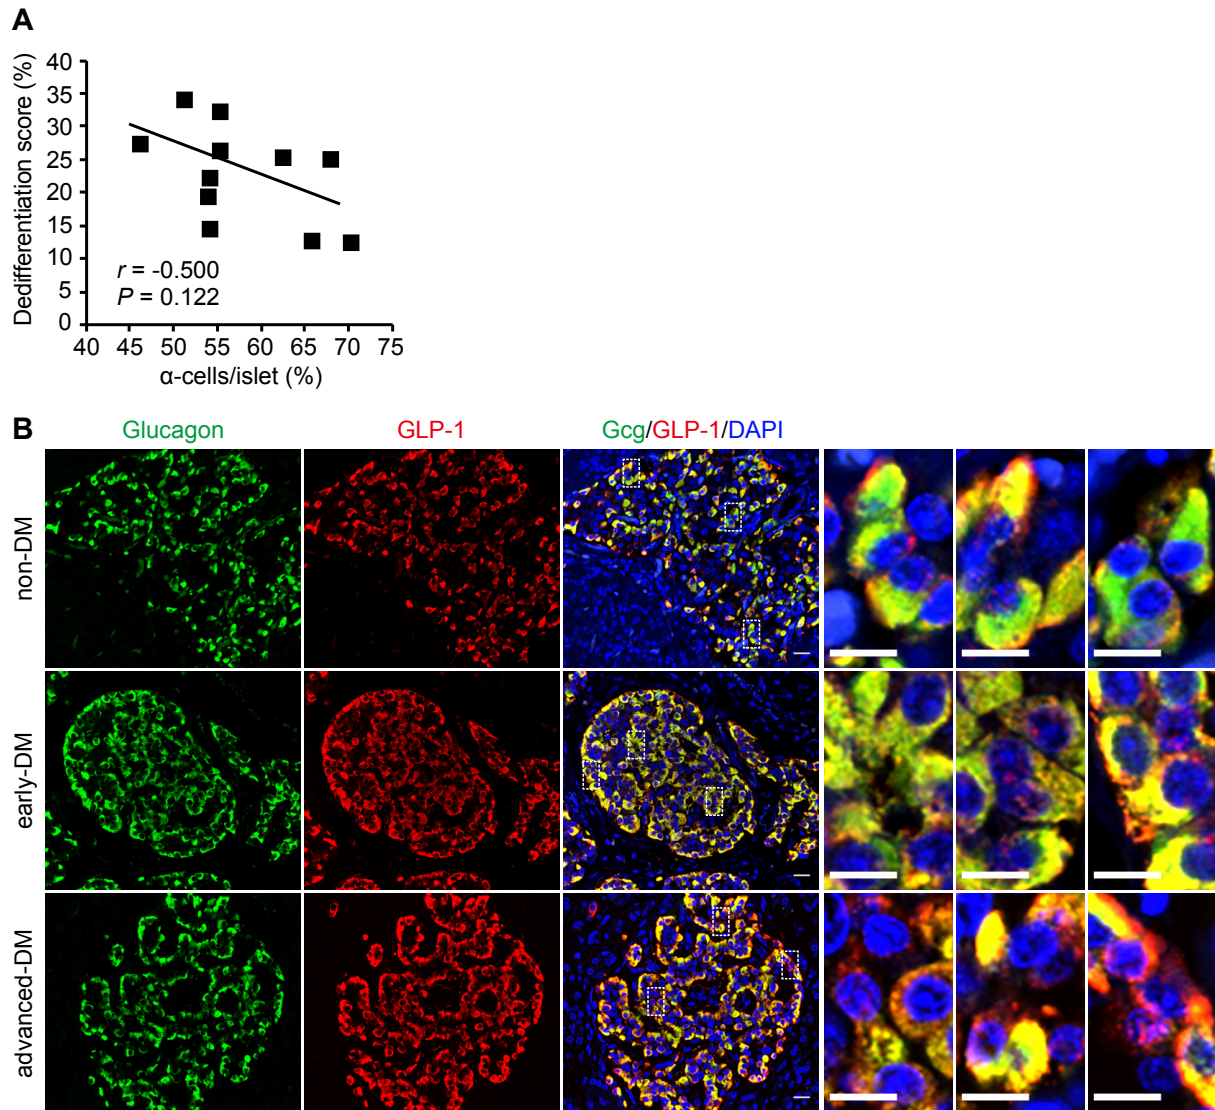

#### Supplemental Figure 4. Alterations in $\alpha$ -cells with disease progression

(A) Correlation between dedifferentiation score and  $\alpha$ -cells/islet in advanced-DM subjects (n=11) (Spearman's  $r$ ). (B) Representative immunofluorescence images of pancreatic islets with glucagon (green), GLP-1 (red) and DAPI (blue). Scale bars, 20  $\mu$ m. The high magnification pictures show representative cells in the islets. Scale bars, 10  $\mu$ m. The immunohistochemical analysis was performed in non-DM (n=5), early-DM (n=6) and advanced-DM (n=8).

**Supplemental Table 1. Clinical characteristics of individual study subjects**

| CaseNo.                | Gender, M/F | Age, years | Operative procedure, PD/DP | Clinical diagnosis | Diabetes duration, years | Maximum BMI, kg/m <sup>2</sup> | BMI at the study, kg/m <sup>2</sup> | HbA1c, % (mmol/mol) | FPG, mmol/l | F-CPR, nmol/l | CPI, nmol/mmol | Complication(s) | Diabetes Treatment |
|------------------------|-------------|------------|----------------------------|--------------------|--------------------------|--------------------------------|-------------------------------------|---------------------|-------------|---------------|----------------|-----------------|--------------------|
| <b>Non-DM</b>          |             |            |                            |                    |                          |                                |                                     |                     |             |               |                |                 |                    |
| 1 <sup>a,b</sup>       | F           | 30         | DP                         | NET                | N/A                      | 26                             | 26                                  | 5.4 (36)            | 5.4         | 0.81          | 0.15           | N/A             | N/A                |
| 2 <sup>a,b</sup>       | M           | 62         | PD                         | DPC                | N/A                      | 27                             | 24                                  | N/A*                | 5.2         | N/A           | N/A            | N/A             | N/A                |
| 3                      | M           | 58         | PD                         | IPMN               | N/A                      | 28.5                           | 26.6                                | 6.1 (43)            | 5.4         | N/A           | N/A            | N/A             | N/A                |
| 4 <sup>a,b</sup>       | M           | 68         | PD                         | CC                 | N/A                      | 26                             | 23                                  | 5.2 (33)            | 5.7         | N/A           | N/A            | N/A             | N/A                |
| 5 <sup>c</sup>         | M           | 77         | PD                         | CC                 | N/A                      | 27                             | 23                                  | 5.2 (33)            | 5.2         | N/A           | N/A            | N/A             | N/A                |
| 6 <sup>a,c</sup>       | M           | 58         | DP                         | PCY                | N/A                      | 25.4                           | 24.4                                | 5.6 (38)            | 5.3         | N/A           | N/A            | N/A             | N/A                |
| 7                      | M           | 73         | PD                         | IPMN               | N/A                      | 27.8                           | 26.1                                | 5.9 (41)            | 4.8         | N/A           | N/A            | N/A             | N/A                |
| 8 <sup>b</sup>         | M           | 60         | DP                         | PC                 | N/A                      | 28                             | 28                                  | 5.8 (40)            | 5.6         | 1.15          | 0.207          | N/A             | N/A                |
| 9 <sup>a</sup>         | M           | 66         | PD                         | PC                 | N/A                      | 25.3                           | 24                                  | 5.9 (41)            | 5.8         | 0.61          | 0.105          | N/A             | N/A                |
| 10 <sup>a,c</sup>      | M           | 58         | DP                         | NET                | N/A                      | 31.4                           | 29.1                                | 5.8 (40)            | 5.3         | 0.66          | 0.125          | N/A             | N/A                |
| 11                     | F           | 61         | DP                         | NET                | N/A                      | 34.2                           | 27                                  | 5.9 (41)            | 5           | 0.36          | 0.073          | N/A             | N/A                |
| <b>Early-DM</b>        |             |            |                            |                    |                          |                                |                                     |                     |             |               |                |                 |                    |
| 12 <sup>b</sup>        | M           | 71         | DP                         | PC                 | 5                        | 28                             | 25                                  | 6.4 (46)            | 7           | N/A           | N/A            | N/A             | Diet               |
| 13 <sup>a,b</sup>      | M           | 70         | DP                         | PC                 | 3                        | 26                             | 21                                  | 6.8 (51)            | 6.8         | N/A           | N/A            | N/A             | Diet               |
| 14 <sup>a</sup>        | M           | 63         | PD                         | DPC                | 3                        | 26                             | 26                                  | 7.6 (60)            | 5.3         | N/A           | N/A            | N/A             | Diet               |
| 15 <sup>a,c</sup>      | M           | 67         | PD                         | CC                 | 4                        | 25.6                           | 22                                  | 6.7 (50)            | 7           | N/A           | N/A            | N/A             | Diet               |
| 16 <sup>a,b,c</sup>    | M           | 66         | DP                         | IPMN               | 3                        | 29                             | 27                                  | 6.3 (45)            | 5.8         | N/A           | N/A            | N/A             | Diet               |
| 17 <sup>a,b</sup>      | M           | 62         | DP                         | PC                 | 5                        | 25                             | 24                                  | 6.9 (52)            | 6.3         | N/A           | N/A            | N/A             | Diet               |
| 18                     | M           | 80         | PD                         | CC                 | 3                        | 25.4                           | 20.7                                | 7.1 (54)            | 6.7         | N/A           | N/A            | N/A             | Diet               |
| 19                     | M           | 71         | DP                         | PC                 | 5                        | 27                             | 22.2                                | 6.2 (44)            | 7.1         | N/A           | N/A            | N/A             | Diet               |
| 20 <sup>a,c</sup>      | M           | 62         | DP                         | PCY                | 5                        | 27.1                           | 25.6                                | 6.8 (51)            | 6.1         | 0.66          | 0.108          | N/A             | GI                 |
| 21                     | F           | 76         | PD                         | PC                 | 4                        | 25.2                           | 24.9                                | 7.3 (56)            | 6.8         | 0.53          | 0.078          | N/A             | DI                 |
| 22                     | M           | 82         | PD                         | CC                 | 5                        | 26.7                           | 24.8                                | 6.4 (46)            | 5.8         | 0.43          | 0.074          | N/A             | DI                 |
| 23 <sup>a</sup>        | M           | 62         | DP                         | NET                | 5                        | 27                             | 23.2                                | 6.3 (45)            | 7.4         | 0.56          | 0.076          | N/A             | DI                 |
| <b>Advanced-DM</b>     |             |            |                            |                    |                          |                                |                                     |                     |             |               |                |                 |                    |
| 24 <sup>c</sup>        | M           | 44         | PD                         | GC                 | 16                       | 28.2                           | 18                                  | 7.6 (60)            | 9.5         | 0.36          | 0.038          | RT              | DI, SU             |
| 25 <sup>b</sup>        | M           | 81         | DP                         | PC                 | 15                       | 30.5                           | 27                                  | 7.5 (58)            | 6.9         | 0.7           | 0.101          | RT              | I                  |
| 26                     | M           | 73         | DP                         | PC                 | 17                       | 26                             | 20.1                                | 6.2 (44)            | 6.3         | 0.18          | 0.029          | NU              | SU                 |
| 27 <sup>a,b</sup>      | M           | 63         | PD                         | PC                 | 20                       | 26                             | 22.2                                | 7.7 (61)            | 9.6         | 0.5           | 0.052          | NU, RT          | DI, GI, M, SU      |
| 28 <sup>a</sup>        | M           | 64         | DP                         | IPMN               | 15                       | 30.4                           | 23.66                               | 7.1 (54)            | 9.6         | 0.4           | 0.042          | NU, RT, NP      | GI, M, SU          |
| 29 <sup>a,b</sup>      | M           | 60         | PD                         | CC                 | 10                       | 29.7                           | 25.5                                | 7.1 (54)            | 8.9         | 0.89          | 0.101          | NEU             | I                  |
| 30                     | F           | 80         | PD                         | PC                 | 30                       | 26.2                           | 20.5                                | 8.5 (69)            | 8.7         | N/A           | N/A            | NU, RT          | DI, GI, SU         |
| 31 <sup>a,b</sup>      | M           | 69         | PD                         | CC                 | 17                       | 27.4                           | 24                                  | 6.4 (46)            | 6.9         | N/A           | N/A            | NU, RT, NP      | I                  |
| 32 <sup>c</sup>        | M           | 78         | PD                         | DPC                | 20                       | 26                             | 22.4                                | 6.6 (49)            | 9.1         | 0.36          | 0.04           | RET             | DI, I, M, SU       |
| 33 <sup>a,b</sup>      | M           | 70         | PD                         | IPMN               | 22                       | 25.2                           | 22.6                                | 8.1 (65)            | 9.5         | 0.1           | 0.01           | NU, RT, NP      | I                  |
| 34 <sup>c</sup>        | M           | 64         | DP                         | IPMN               | 10                       | 25                             | 24.72                               | 7.7 (61)            | 9.8         | 0.4           | 0.04           | NP              | DI, I              |
| <b>Intermediate-DM</b> |             |            |                            |                    |                          |                                |                                     |                     |             |               |                |                 |                    |
| 35                     | F           | 76         | DP                         | PC                 | 10                       | 26.4                           | 26.4                                | 8.1 (65)            | 7.6         | 0.43          | 0.057          | N/A             | GI, P              |
| 36                     | M           | 43         | DP                         | IPMN               | 7                        | 28.6                           | 27.5                                | 7.4 (57)            | 7.6         | 0.53          | 0.07           | N/A             | DI, M, SU          |
| 37                     | M           | 62         | PD                         | NET                | 9                        | 31.8                           | 25.5                                | 6.3 (45)            | 5.2         | 0.36          | 0.07           | NU, RT          | GI, SU             |

\*This case received 75g-OGTT prior to the operation but lacked a preoperative HbA1c measurement; <sup>a</sup>The subjects in whom insulin/glucagon-double positive cells were analyzed; <sup>b</sup>The subjects in whom transcription factors were analyzed; <sup>c</sup>The subjects in whom amylase were analyzed.

Abbreviations: BMI, body mass index, CC, cholangiocarcinoma; CPI, C-peptide index; DI, DPP-4 inhibitor; DP, distal pancreatectomy; DPC, duodenal papilla cancer; FPG, fasting plasma glucose; F-CPR, fasting C-peptide immunoreactivity; GC, gallbladder cancer; GI,  $\alpha$ -glucosidase inhibitor; I, insulin; IPMN, intraductal papillary mucinous neoplasia; M, metformin; NU, neuropathy; NP, nephropathy; NET, neuroendocrine tumor; P, pioglitazone; PC, pancreatic cancer; PCY, pancreatic cyst; PD, pancreatoduodenectomy; RT, retinopathy; SU, sulfonylurea

**Supplemental Table 2. Single regression analyses of dedifferentiation score with C-peptide index and diabetes duration in each group**

| Dedifferentiation score vs. |          | CPI     | Diabetes duration |
|-----------------------------|----------|---------|-------------------|
| Non-DM                      | <i>r</i> | -0.6    | N/A               |
|                             | <i>P</i> | 0.35    | N/A               |
| Early/intermediate-DM       | <i>r</i> | -0.7928 | 0.3691            |
|                             | <i>P</i> | 0.0397  | 0.1755            |
| Advanced-DM                 | <i>r</i> | 0.2857  | 0.4129            |
|                             | <i>P</i> | 0.4529  | 0.2068            |

Summary of single regression analysis (Spearman's  $r$ ) for correlation between dedifferentiation scores and c-peptide index (n=5 for non-DM, n=7 for early/intermediate-DM, n=9 for advanced-DM), and diabetes duration (n=11 for non-DM, n=15 for early/intermediate-DM, n=11 for advanced-DM). The analysis was performed for each group. CPI, C-peptide index.

**Supplemental Table 3. The features of the subjects analyzed in Figure 4 and the classification into 3 comparison sets**

|                | Case No. | Gender (M/F) | Age (years) | Operative procedure | Clinical diagnosis | Islet area (%) | Dedifferentiation score (%) |
|----------------|----------|--------------|-------------|---------------------|--------------------|----------------|-----------------------------|
| Set 1          |          |              |             |                     |                    |                |                             |
| A. non-DM      | 5        | M            | 77          | PD                  | CC                 | 3.3            | 0.7                         |
| B. early-DM    | 16       | M            | 66          | DP                  | IPMN               | 3.7            | 14.8                        |
| C. advanced-DM | 32       | M            | 78          | PD                  | DPC                | 3.7            | 29.2                        |
| Set 2          |          |              |             |                     |                    |                |                             |
| D. non-DM      | 6        | M            | 66          | DP                  | PCY                | 1.8            | 3.6                         |
| E. early-DM    | 20       | M            | 62          | DP                  | PCY                | 2.5            | 12.5                        |
| F. advanced-DM | 34       | M            | 64          | DP                  | IPMN               | 3              | 14.2                        |
| Set 3          |          |              |             |                     |                    |                |                             |
| G. non-DM      | 10       | M            | 58          | DP                  | NET                | 1.5            | 4.2                         |
| H. early-DM    | 15       | M            | 67          | PD                  | CC                 | 1.4            | 28.3                        |
| I. advanced-DM | 24       | M            | 44          | PD                  | GC                 | 1.1            | 16.2                        |

CC, cholangiocarcinoma; DP, distal pancreatectomy; DPC, duodenal papilla cancer; GC, gallbladder cancer; IPMN, intraductal papillary mucinous neoplasia; NET, neuroendocrine tumor; PCY, pancreatic cyst; PD, pancreatoduodenectomy



**Supplemental Table 4. Antibodies used for immunohistochemistry**

| Primary antibodies     |                                |                                              |                        |          |
|------------------------|--------------------------------|----------------------------------------------|------------------------|----------|
| Antigen                | Species (Clone No.)            | Source                                       | RRID/Cat. No.          | Dilution |
| Insulin                | Guinea pig                     | Agilent, Santa Clara, CA, USA                | AB_2800361/IR002       | premixed |
| Glucagon               | Mouse (79bB10)                 | Sigma-Aldrich, Saint Louis, MO, USA          | AB_259852/G2654        | 1:2,000  |
| Glucagon               | Rabbit                         | CST Japan, Tokyo, Japan                      | AB_659831/#2760        | 1:100    |
| Somatostatin           | Rabbit                         | Abcam, Cambridge, UK                         | AB_11158517/ab108456   | 1:200    |
| Pancreatic polypeptide | Rabbit                         | Phoenix Pharmaceuticals, Burlingame, CA, USA | NA/H-054-02            | 1:200    |
| Chromogranin A         | Goat                           | Santa Cruz Biotechnology, Dallas, TX, USA    | AB_2276319/sc-1488     | 1:100    |
| Chromogranin A         | Mouse (LK2H10)                 | Merck Millipore, Burlington, MA, USA         | AB_2081136/MAB5268     | 1:100    |
| Amylase                | Mouse (AMY-7)                  | Sigma-Aldrich                                | NA/SAB4200673          | 1:100    |
| MAFA                   | Rabbit                         | Bethyl, Montgomery, TX, USA                  | AB_1279486/IHC-00352   | 1:200    |
| NKX6.1                 | Rabbit                         | CST Japan                                    | AB_2722625/#54551      | 1:1,000  |
| GLP-1                  | Rabbit                         | Abcam                                        | AB_447206/ab22625      | 1:1,000  |
| Secondary antibodies   |                                |                                              |                        |          |
| Antigen                | Species                        | Source                                       | RRID/Cat. No.          | Dilution |
| Guinea pig             | Donkey (FITC-conjugated)       | Jackson ImmunoResearch, West Grove, PA, USA  | AB_2340453/706-095-148 | 1:200    |
| Guinea pig             | Donkey (Cy3-conjugated)        | Jackson ImmunoResearch                       | AB_2340460/706-165-148 | 1:500    |
| Guinea pig             | Donkey (DyLight405-conjugated) | Jackson ImmunoResearch                       | AB_2340470/706-475-148 | 1:500    |
| Mouse                  | Donkey (FITC-conjugated)       | Jackson ImmunoResearch                       | AB_2340792/715-095-150 | 1:200    |
| Mouse                  | Donkey (Cy3-conjugated)        | Jackson ImmunoResearch                       | AB_2340813/715-165-150 | 1:500    |
| Rabbit                 | Donkey (FITC-conjugated)       | Jackson ImmunoResearch                       | AB_2315776/711-095-152 | 1:200    |
| Rabbit                 | Donkey (Cy3-conjugated)        | Jackson ImmunoResearch                       | AB_2307443/711-165-152 | 1:500    |
| Goat                   | Donkey (Cy3-conjugated)        | Jackson ImmunoResearch                       | AB_2340411/705-165-003 | 1:500    |

FITC, fluorescein isothiocyanate; Cy3, cyanine dye 3
